# Supplementary material for: Current Status, Challenges, and Future Perspectives of Real-World Data and Real-World Evidence in Japan
Source: PubMed Central journal article supplement — Drugs Real World Outcomes. 2021 Jun 19;8(4):459–80. doi: 10.1007/s40801-021-00266-3 (PMC8605941; doi:10.1007/s40801-021-00266-3), 2021-06-19
Supplement: 40801_2021_266_MOESM1_ESM.pdf [file 40801_2021_266_MOESM1_ESM.pdf]

**Journal:** *Drugs-Real World Outcomes*

**Article type:** Review Article

**Title:** Current Status, Challenges, and Future Perspectives of Real-World Data and Real-World Evidence in Japan

**Authors:** Katsutoshi Hiramatsu<sup>1</sup>, Annabel Barrett<sup>2</sup>, Yasuhiko Miyata<sup>3</sup>, on behalf of PhRMA Japan Medical Affairs

Working Group 1

<sup>1</sup>Amgen K.K., Tokyo, Japan

<sup>2</sup>Eli Lilly and Company Limited, Berkshire, UK

<sup>3</sup>Bristol Myers Squibb K.K., Tokyo, Japan

**Address for correspondence:** Katsutoshi Hiramatsu, Amgen K.K., Midtown Tower 9-7-1 Akasaka, Minato-ku, Tokyo

107-6239, Japan

Tel: +81-3-5293-9476; Fax: +81-6745-8022

E-mail address: [khiramat@amgen.com](mailto:khiramat@amgen.com)

ORCID: 0000-0002-0746-7557

**Short title:** Real-World Data and Real-World Evidence in Japan

## Supplementary Materials

**Supplementary Table 1** Real-world databases available in Japan [1]

| Database name                          | Summary of database                                                                                                                                                               | Database administrator                           | Registered patients (x10,000) | Data Period (year) |
|----------------------------------------|-----------------------------------------------------------------------------------------------------------------------------------------------------------------------------------|--------------------------------------------------|-------------------------------|--------------------|
| <b><i>Hospital-based</i></b>           |                                                                                                                                                                                   |                                                  |                               |                    |
| NHO Clinical Data Archives             | Database containing electronic medical record information of 63 NHO hospitals                                                                                                     | NHO Headquarters                                 | 190                           | 2016~2019          |
| MIA databank                           | Database containing DPC and receipt information of NHO 141 hospitals                                                                                                              | NHO Headquarters                                 | 2,000                         | 2010~2019          |
| Convergence CGRN                       | A network that anonymizes and makes available clinical data in medical institutions                                                                                               | CCT                                              | 390                           | Unknown ~2019      |
| RWD database                           | Integrated database of medical information such as electronic medical records, DPCs, and receipts                                                                                 | Real World Data, Co., Ltd.                       | 1,900                         | 2003~2019          |
| Medical Information Database Network   | A medical information database managed by PMDA that consists of electronic medical records, receipts, and DPC data.                                                               | PMDA                                             | 470                           | 2009~2019          |
| EBM provider®                          | Database of inpatient and outpatient care at 385 acute-care institutions nationwide                                                                                               | Medical Data Vision Co., Ltd.                    | 2,844                         | 2008~2019          |
| JMDC Claims Database (hospital-based)  | Database of receipts and DPC data from multiple medical institutions                                                                                                              | JMDC                                             | 880                           | 2014~2019          |
| National Clinical Database             | The Registry of Surgery, Interventions, Pathology, and Organ Cancer is operated mainly by the Japan Surgical Society. Can be used in conjunction with DPC and reception databases | NCD                                              | 1,200                         | 2011~2019          |
| <b><i>Insurance-based</i></b>          |                                                                                                                                                                                   |                                                  |                               |                    |
| JMDC Claims Database (insurance-based) | Database with multiple health insurance subscribers (total number) as data sources                                                                                                | JMDC                                             | 740                           | 2005~2019          |
| JammNet database                       | Database of receipt data from multiple health insurance societies                                                                                                                 | JammNet                                          | 255                           | 2008~2019          |
| MinaCare Database                      | Database of health insurance claims and health information from multiple health insurance societies                                                                               | MinaCare                                         | 630                           | 2008~2018          |
| Medi-Scope                             | Include almost all items of all receipt types (dental)                                                                                                                            | Kyowa Kikaku Ltd.                                | 666                           | 2010~2019          |
| <b><i>Pharmacy-based</i></b>           |                                                                                                                                                                                   |                                                  |                               |                    |
| Medi-Trend                             | External prescription database, number of collection pharmacy stores (approx. 880 stores) and prescriptions (approx. 16 million sheets/year)                                      | Kyowa Kikaku Ltd.                                | 647                           | 2009~2019          |
| IQVIA NPA data                         | Compounding receipt database with data source of about 9,200 dispensing pharmacies (2018 total prescriptions, 151 million)                                                        | IQVIA Solutions Japan K.K.                       | 3,200                         | 2015~2019          |
| JMIRI Pharmacy Claims DB               | Receipt database with external prescription as data source                                                                                                                        | JMIRI                                            | 3,900                         | 2006~2019          |
| Nihon Chouzai Pharmacy Claims database | Database of prescriptions issued outside the hospital by medical institutions, various surveys on patients, DTC; dispensing at 603 stores                                         | Japan Medical Research Institute (Nihon-Chouzai) | 1,623                         | 2001~2019          |
| PFR                                    | Out-of-hospital prescription analysis service; information contained in external prescriptions can be used, information can be provided without time lag                          | PFR                                              | 820                           | 2017~2019          |
| <b><i>Others</i></b>                   |                                                                                                                                                                                   |                                                  |                               |                    |
| NHWS                                   | Survey results from >2 million people in 10 major countries; prevalence, diagnosis and treatment rates of >165 diseases, QOL, WPAI, severity and drugs used                       | SSRI                                             | 200                           | Before 2000~2019   |

|                        |                                                                                                                                                                                                                                |      |    |           |
|------------------------|--------------------------------------------------------------------------------------------------------------------------------------------------------------------------------------------------------------------------------|------|----|-----------|
| PatientsMap<br>2019 JP | can be identified<br>Survey results database from >20,000 Japanese<br>doctors; an estimate of consultation rates and patient<br>numbers of ~400 diseases, diseases requiring new<br>drugs, and sales visits from >50 companies | SSRI | 16 | 2011~2018 |
|------------------------|--------------------------------------------------------------------------------------------------------------------------------------------------------------------------------------------------------------------------------|------|----|-----------|

*CGRN* Clinical Trial Global Research Network, *CCT* Convergence CT Inc., *DPC* Diagnosis Procedure Combination, *DTC* direct to consumer, *JMDC* Japan Medical Data Center Inc., *JMIRI* Japan Medical Information Research Institute, *MIA* Medical Information Analysis, *NCD* National Clinical Database, *NHO* National Hospital Organization, *NHWS* National Health and Wellness Survey, *NPA* National Prescription Audit, *PMDA* Pharmaceuticals and Medical Devices Agency, *QOL* quality of life, *SSRI* Social Survey Research Information Co., Ltd., *PFR* product flash report, *WPAI* work productivity and activity impairment

## Supplementary Fig. 1. The search strategy

### 1. PubMed search strategy

*(((Perspective[tiab] OR "guideline"[tiab] OR "regulation"[tiab] OR approach\*[tiab] OR policy\*[tiab]) AND ("HTA agency" OR "Regulatory agency" OR industry[tiab] OR "healthcare provider"[tiab] OR "healthcare payer"[tiab] OR stakeholder\*[tiab]) AND ("real world data" OR "real world evidence" OR "real world outcome" OR "clinical effectiveness data" OR "hospital data" OR "electronic health records" OR "patient registry" OR "effectiveness"[tiab] OR "alternative study design") AND ("Pragmatic clinical trial" OR "observational design" OR "post-marketing study" OR comparative OR observ\*[tiab] OR design\*[tiab]) AND ("comparative effectiveness research" OR "outcomes research" OR "relative effectiveness assessment" OR "evidence"[tiab] OR "decision making"[tiab] OR "comparative effectiveness"[tiab]))) AND ("2010/01/01"[PDat] : "2019/12/31"[PDat]))*

### 2. Ichushi-Web search strategy

*("real world data (in Japanese)" OR "real world evidence (in Japanese)") AND ("definition (in Japanese)") AND (from January 1, 2010 to December 31, 2019[year of publication of the listing])*

**Supplementary Fig. 2.** Collaborative research between SCRUM-Japan and pharmaceutical companies [2]. Reproduced with permission from Dr. Ohtsu Atsushi as well as Kagakuhyoronsya Co., Ltd. Copyright© 2018 with “New approaches in SCRUM-Japan Registry”. All rights reserved

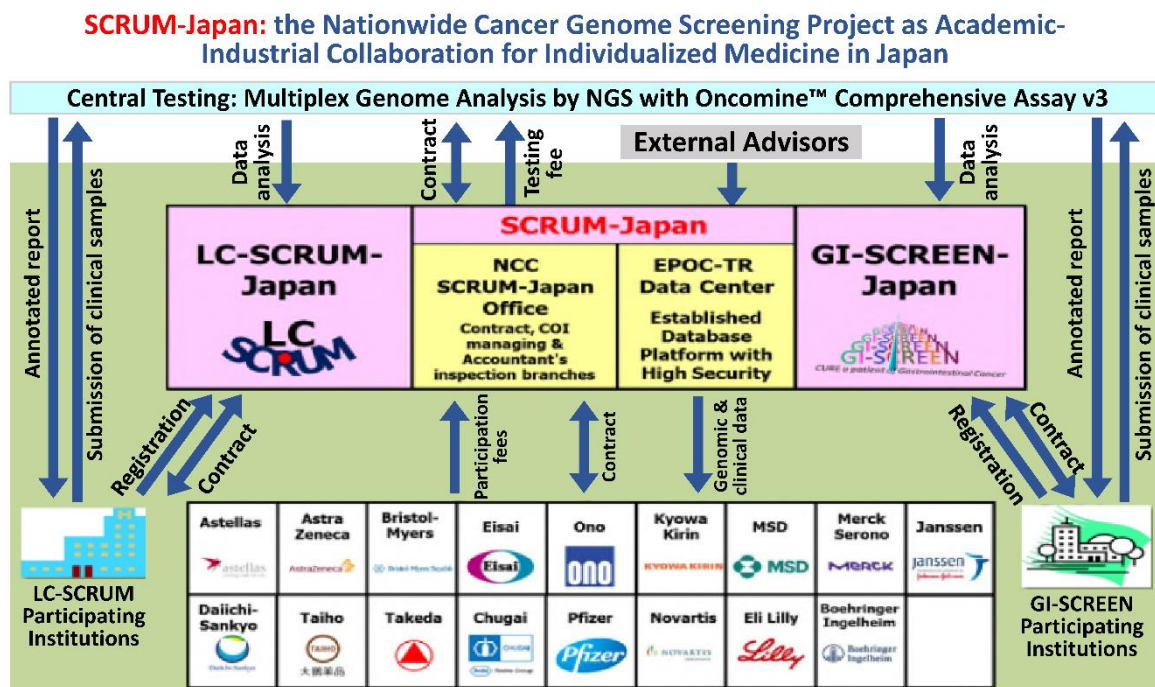

## References

1. Japanese Society for Pharmacoepidemiology. Databases available for pharmacoepidemiology researchers in Japan (information obtained from survey answers as of August 2020). 2020. [http://www.jspe.jp/mt-static/FileUpload/files/JSPE\\_DB\\_TF\\_E.pdf](http://www.jspe.jp/mt-static/FileUpload/files/JSPE_DB_TF_E.pdf) [English version]. Accessed 9 April 2021.
2. Otsu A, Okamoto W, Fuse M, et al. From an academic perspective: new initiatives in the SCRUM-Japan Registry. Presented at: The 8th Joint Cancer New Drug Development Symposium. 2018.
